# Supplementary material for: Development of a Synthetic, Injectable Hydrogel to Capture Residual Glioblastoma and Glioblastoma Stem‐Like Cells with CXCL12‐Mediated Chemotaxis
Source: PubMed Central journal article supplement — Adv Healthc Mater. 2023 Apr 20;12(14):2300671. doi: 10.1002/adhm.202300671 (PMC11469263; doi:10.1002/adhm.202300671), 2023-04-20
Supplement: ADHM-12-2300671-s001.pdf [file ADHM-12-2300671-s001.pdf]

# ADVANCED HEALTHCARE MATERIALS

## Supporting Information

for *Adv. Healthcare Mater.*, DOI 10.1002/adhm.202300671

Development of a Synthetic, Injectable Hydrogel to Capture Residual Glioblastoma and Glioblastoma Stem-Like Cells with CXCL12-Mediated Chemotaxis

*Zerin Mahzabin Khan, Jennifer M. Munson, Timothy E. Long, Eli Vlasisavljevich and Scott S. Verbridge\**

## Supporting Information

## Development of a Synthetic, Injectable Hydrogel to Capture Residual Glioblastoma and Glioblastoma Stem-like cells with CXCL12-mediated Chemotaxis

Zerin Mahzabin Khan, Jennifer M. Munson, Timothy E. Long, Eli Vlasisavljevich, Scott S. Verbridge\*

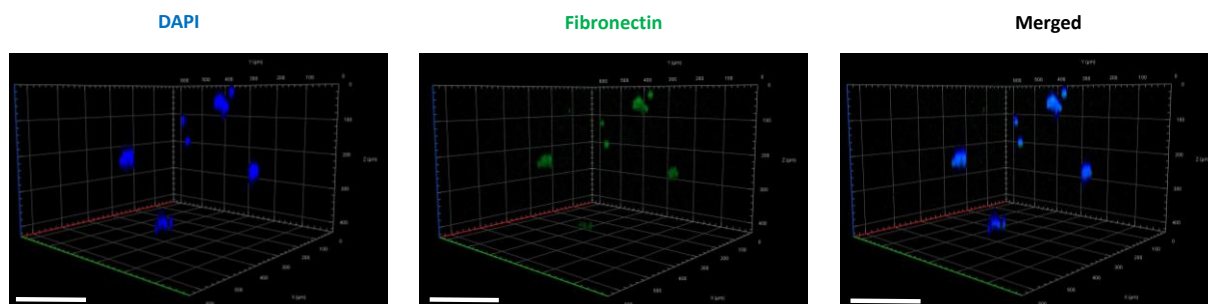

**Figure S1.** Confocal microscope z-stack images of fibronectin deposition by U251 GBM cells encapsulated in synthetic hydrogels. Cells were encapsulated at a density of  $1 \times 10^6$  cells/mL and cultured in complete DMEM media for 72 hours. Fibronectin deposition observed up to approximately 400  $\mu\text{m}$  deep in synthetic hydrogel. Scale bars represent 200  $\mu\text{m}$ .

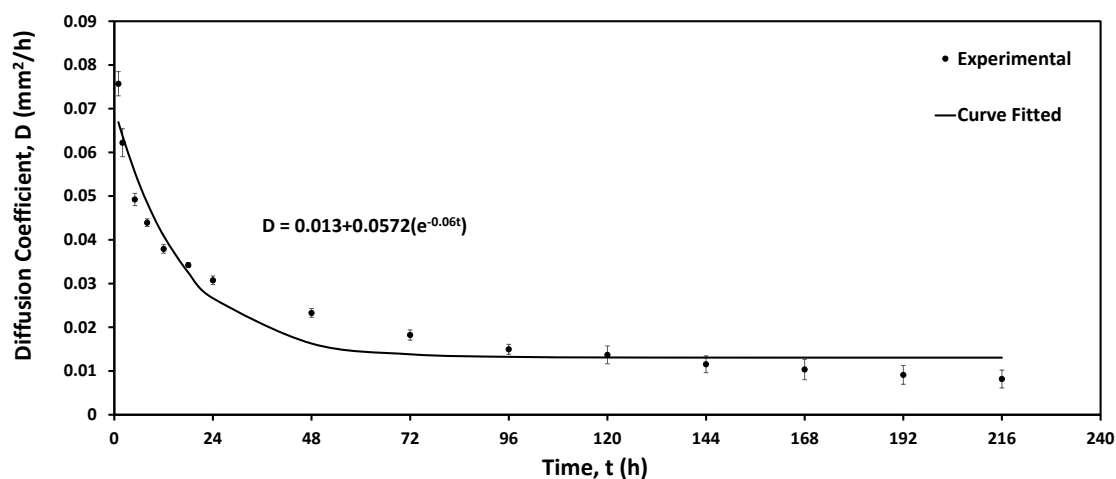

**Figure S2.** Time varying diffusivity of 10 kDa FITC-dextran loaded into synthetic hydrogels at 5  $\mu\text{g/mL}$  payload concentration. The diffusion coefficients were determined based on experimental data obtained from the cumulative release profile. Experimental data-based diffusion coefficients fit the exponential equation with an  $R^2$  value of 0.952.
